# Supplementary material for: Hypokalaemic periodic paralysis and myotonia in a patient with homozygous mutation p.R1451L in NaV1.4
Source: PubMed Central journal article supplement (PMC6018793; doi:10.1038/s41598-018-27822-2), 2018-06-26
Supplement: 41598_2018_27822_MOESM1_ESM.pdf [file 41598_2018_27822_MOESM1_ESM.pdf]

Supplementary information to

Hypokalaemic periodic paralysis and myotonia in a patient with homozygous mutation p.R1451L in Nav1.4

Sushan Luo<sup>a,b,1</sup>, Marisol Sampedro Castañeda<sup>c,1</sup>, Emma Matthews<sup>c</sup>, Richa Sud<sup>c</sup>, Michael G Hanna<sup>c</sup>, Jian Sun<sup>a</sup>, Jie Song<sup>a</sup>, Jiahong Lu<sup>a</sup>, Kai Qiao<sup>d,\*</sup>, Chongbo Zhao<sup>a,e,\*</sup>, Roope Männikkö<sup>c,\*\*</sup>

<sup>a</sup>*Department of Neurology, Huashan Hospital, Fudan University, Shanghai, China 200040*

<sup>b</sup>*Department of Neurology, North Huashan Hospital, Fudan University, Shanghai, 200003, China*

<sup>c</sup>*MRC Centre for Neuromuscular Diseases, Department of Molecular Neuroscience, UCL Institute of Neurology, London, WC1N 3BG, UK*

<sup>d</sup>*Department of Clinical Electrophysiology, Institute of Neurology, Huashan Hospital, Fudan University, Shanghai, China 200040*

<sup>e</sup>*Department of Neurology, Jing'an District Center Hospital of Shanghai, Shanghai, China 200040*

Supplementary table S1. Genes included in the panel for targeted next generation sequencing.

| Skeletal ion Channel related genes |         |         |        |          |        |         |
|------------------------------------|---------|---------|--------|----------|--------|---------|
| ALG13                              | CACNA1S | CAV3    | CLCN1  | KCNA2    | KCNE3  | KCNJ18  |
| KCNJ2                              | SCN4A   | TMEM43  |        |          |        |         |
| Primary myopathies related genes   |         |         |        |          |        |         |
| ABHD5                              | ACADL   | ACADM   | ACADS  | ACADVL   | ACTA1  | ACTN3   |
| ACVR1                              | ADCK3   | AGK     | AGL    | AGRN     | ALDOA  | ALG14   |
| ALG2                               | ANO5    | ARFGAP2 | ATP2A1 | B3GALNT2 | B3GNT1 | B4GALT1 |
| B4GAT1                             | BAG3    | BIN1    | BOLA3  | C10orf2  | CAPN3  | CASQ1   |
| CCDC78                             | CELF1   | CFL2    | CHAT   | CHCHD10  | CHKB   | CHRNA1  |
| CHRNB1                             | CHRNA1  | CHRNE   | CHRNA1 | CKM      | CMYA5  | CNBP    |
| CNTN1                              | COL12A1 | COL6A1  | COL6A2 | COL6A3   | COLQ   | COQ2    |
| COQ6                               | COQ9    | CPT2    | CRYAB  | CSRP3    | DAG1   | DES     |
| DMD                                | DMPK    | DNAJB6  | DNM2   | DOK7     | DOLK   | DPAGT1  |
| DPM1                               | DPM2    | DPM3    | DUX4   | DYSF     | EMD    | ENO3    |
| EPM2A                              | ETFA    | ETFB    | ETFDH  | ETHE1    | FBXO32 | FHL1    |
| FHL2                               | FKRP    | FKTN    | FLNC   | GAA      | GBE1   | GFPT1   |
| GMPPB                              | GNE     | GYG1    | GYS1   | HACD1    | HADH   | HINT1   |
| HNRNPDL                            | HSPG2   | ISCU    | ISPD   | ITGA7    | ITGA9  | KBTBD13 |
| KLHL40                             | KLHL41  | KLHL9   | KY     | LAMA2    | LAMB2  | LAMP1   |
| LAMP2                              | LARGE   | LDB3    | LDHA   | LDHB     | LIFR   | LIMS2   |
| LMNA                               | LPIN1   | LRP4    | MATR3  | MBNL1    | MBNL2  | MBNL3   |
| MEGF10                             | MICU1   | MSTN    | MTM1   | MTMR14   | MUSK   | MYBPC1  |
| MYBPC2                             | MYBPC3  | MYH1    | MYH2   | MYH3     | MYH4   | MYH7    |
| MYH8                               | MYL1    | MYL10   | MYL12A | MYL12B   | MYL2   | MYL3    |
| MYL4                               | MYL5    | MYL6    | MYL6B  | MYL7     | MYL9   | MYLIP   |

---

|        |          |          |         |         |          |         |
|--------|----------|----------|---------|---------|----------|---------|
| MYLK   | MYLK2    | MYLK3    | MYLK4   | MYLPF   | MYOM1    | MYOM2   |
| MYOM3  | MYOT     | MYOZ1    | MYOZ2   | MYOZ3   | MYPN     | NBR1    |
| NEB    | NEBL     | NHLRC1   | NTRK1   | OBSCN   | OBSL1    | OPA1    |
| ORAI1  | PABPN1   | PDLIM3   | PDLIM5  | PDLIM7  | PDSS1    | PDSS2   |
| PFKM   | PGAM2    | PGK1     | PGM1    | PHKA1   | PLEC     | PLEKHG4 |
| PLN    | PNPLA2   | POLG     | POMGNT1 | POMGNT2 | POMK     | POMT1   |
| POMT2  | PRKAG2   | PTRF     | PUS1    | PYGM    | QDPR     | RAPSN   |
| RBCK1  | RRM2B    | RYR1     | SEPN1   | SGCA    | SGCB     | SGCD    |
| SGCG   | SLC22A5  | SLC25A20 | SLC25A4 | SMCHD1  | SOX10    | SPEG    |
| SQSTM1 | SRF      | STIM1    | SUCLA2  | SYNE1   | SYNE2    | SYNE3   |
| SYNPO2 | SYT2     | TCAP     | TIA1    | TK2     | TMEM5    | TMOD3   |
| TNNC1  | TNNC2    | TNNI1    | TNNI2   | TNNI3   | TNNT1    | TNNT3   |
| TNPO3  | TOR1AIP1 | TPM1     | TPM2    | TPM3    | TRAPPC11 | TRIM32  |
| TRIM55 | TRIM63   | TTN      | TTR     | VCP     | VMA21    | YARS2   |

---

Supplementary Figure S1. Rate of closed state inactivation depends on holding voltage.

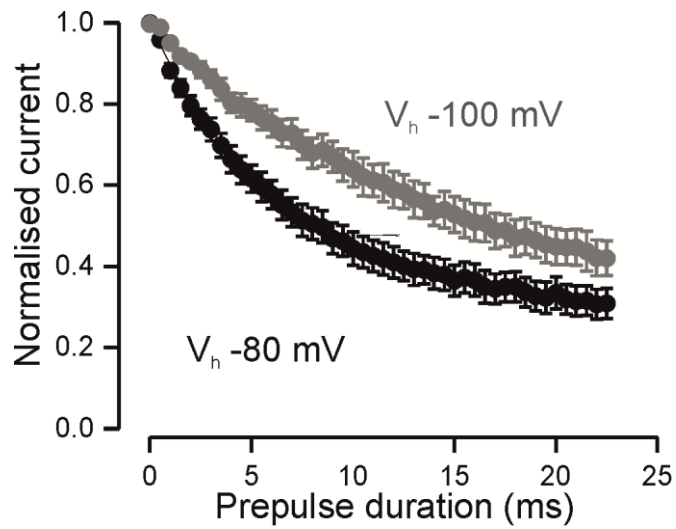

A. Rate of closed state inactivation at -60 mV from  $V_h$  -100 mV (grey) or from  $V_h$  -80 mV (black) for wild-type channels. Current in response to test voltage is plotted against the time at pre-pulse voltage. Data are normalised to maximum current in response to test pulse. Voltage protocol is shown in Fig 5G.
